# Supplementary material
Source: ML conference proceedings conference paper supplement (https://openaccess.thecvf.com/content/ICCV2023/html/Dibene_General_Planar_Motion_ICCV_2023_paper.html)
Supplement: Supplementary file 1 [file Dibene_General_Planar_Motion_ICCV_2023_supplemental.pdf]

# General Planar Motion from a Pair of 3D Correspondences - Supplementary

Juan Carlos Dibene

Zhixiang Min

Enrique Dunn

Stevens Institute of Technology

{jdibenes, zmin1, edunn}@stevens.edu

## 1. Additional Results on Synthetic Data

**Ground Plane Calibration Error.** We present in Figure 1 the results when the motions in our synthetic dataset are rotated about the  $z$  axis. As mentioned in the original submission, the results are very similar as when rotating about the  $x$  axis. Our method is unaffected by ground plane calibration, and outperforms the calibrated planar solvers [6, 1, 3].

**Non-planarity of motion.** In Figure 2, we report the results for motion non-planarity considering the case when the rotation axis is rotated toward the translation vector, mentioned in the original submission. This particular case also contains ground plane calibration error, which is the reason our method performs better compared to the non-planarity experiment (rotating the translation towards the rotation axis) in the original submission.

## 2. RANSAC solvers time

Table 1 shows the median number of iterations and execution times in milliseconds for the RANSAC solvers for all sequences of the real datasets (KITTI and TUM). Our solver achieves a speed up of  $\sim 2x$  w.r.t. the other methods on the KITTI dataset and is faster than the other methods (except the Ackermann solver) on the TUM dataset. The Ackermann solver requires fewer iterations (and thus less time) on the TUM dataset since it is better suited to this dataset than the KITTI dataset.

Table 1. Median number of iterations and execution times (in milliseconds) for the RANSAC solvers on the real datasets for all sequences. All solvers implemented in MATLAB R2020b.

|                      | KITTI  |             | TUM    |             |
|----------------------|--------|-------------|--------|-------------|
|                      | Iters. | Time        | Iters. | Time        |
| 2pt-5dof-3d3d (ours) | 19     | <b>1.14</b> | 10     | 0.61        |
| 1pt-1*dof-2d2d [6]   | 53     | 2.25        | 7      | <b>0.36</b> |
| 2pt-3dof-2d3d [1]    | 16     | 2.93        | 8      | 1.67        |
| 3pt-6dof-3d3d [4]    | 52     | 2.50        | 18     | 0.85        |
| 3pt-6dof-2d3d [5]    | 7      | 2.13        | 7      | 2.36        |
| 3pt-2*dof-2d2d [3]   | 33     | 18.92       | 10     | 7.54        |

## 3. Additional Results on Real Data

**KITTI Dataset.** As mentioned in the original submission, we reported only the results for the first four sequences of the dataset considering a stride of 1 frame. In this supplementary material, we report the results for the remaining seven sequences in Table 2. We still observe that our method yields better orientation estimates compared to the other planar methods [6, 1, 3], and comparable translation estimates. As indicated in the original submission, we also report results considering different strides. In Table 3 we present the results for a stride of 2 and in Table 4 we report the results for a stride of 5. In both cases, we observe that our method still provides better orientation estimates compared to the planar solvers of [6, 1, 3] and also yields better translation estimates.

**TUM Dataset.** In the original submission, we reported results on the dataset considering a stride of 1 frame. Here, we report results considering a stride of 5 in Table 5 and a stride of 10 in Table 6. For stride of 5, we observe that the Ackermann solver of [6] still provides the best orientation and translation estimates of the evaluated planar methods, while our method has a higher success rate. However, for a stride of 10, we observe that our method provides the best orientation and translation estimates of the planar methods [6, 1, 3].

## References

- [1] Sung-In Choi and Soon-Yong Park. A new 2-point absolute pose estimation algorithm under planar motion. *Advanced Robotics*, 29:1–9, 05 2015.
- [2] Andreas Geiger, Philip Lenz, and Raquel Urtasun. Are we ready for autonomous driving? the kitti vision benchmark suite. In *Conference on Computer Vision and Pattern Recognition (CVPR)*, 2012.
- [3] Levente Hajder and Daniel Barath. Least-squares optimal relative planar motion for vehicle-mounted cameras. In *2020 IEEE International Conference on Robotics and Automation (ICRA)*, pages 8644–8650, 2020.
- [4] B. Horn. *Robot Vision*. MIT electrical engineering and computer science series. McGraw-Hill Book Company, 1986.
- [5] Mikael Persson and Klas Nordberg. Lambda twist: An accurate fast robust perspective three point (p3p) solver. In

Table 2. Median orientation error (in degrees), translation error (in meters), and success rate (in %) on the KITTI dataset [2] (stride of 1). Best in bold, best of planar methods underlined. The column ALL contains the median for all 11 sequences.

| Sequence             | 00           |              | 01           |              | 02           |              | 03           |              | 04           |              | 05           |              |  |  |
|----------------------|--------------|--------------|--------------|--------------|--------------|--------------|--------------|--------------|--------------|--------------|--------------|--------------|--|--|
|                      | deg          | m            |  |  |
| 2pt-5dof-3d3d (ours) | <u>0.186</u> | <u>0.105</u> | 0.143        | 1.274        | <u>0.181</u> | 0.116        | <u>0.177</u> | 0.125        | 0.169        | 0.202        | <u>0.153</u> | 0.104        |  |  |
| 1pt-1*dof-2d2d [6]   | 0.319        | 0.631        | 0.194        | 1.931        | 0.274        | 0.918        | 0.256        | 0.498        | 0.147        | 1.073        | 0.206        | 0.654        |  |  |
| 2pt-3dof-2d3d [1]    | 0.237        | 0.109        | <u>0.112</u> | <u>0.378</u> | 0.198        | <u>0.094</u> | 0.182        | <u>0.094</u> | <u>0.119</u> | <u>0.118</u> | 0.163        | <u>0.081</u> |  |  |
| 3pt-6dof-3d3d [4]    | 0.255        | 0.129        | 0.359        | 2.025        | 0.270        | 0.147        | 0.242        | 0.152        | 0.318        | 0.363        | 0.227        | 0.121        |  |  |
| 3pt-6dof-2d3d [5]    | <b>0.090</b> | <b>0.032</b> | <b>0.082</b> | <b>0.238</b> | <b>0.093</b> | <b>0.035</b> | <b>0.070</b> | <b>0.029</b> | <b>0.091</b> | <b>0.057</b> | <b>0.078</b> | <b>0.029</b> |  |  |
| 3pt-2*dof-2d2d [3]   | 0.247        | 0.130        | 0.134        | 0.654        | 0.206        | 0.114        | 0.200        | 0.110        | 0.156        | 0.186        | 0.178        | 0.100        |  |  |

  

| Sequence             | 06           |              | 07           |              | 08           |              | 09           |              | 10           |              | ALL          |              | %            |
|----------------------|--------------|--------------|--------------|--------------|--------------|--------------|--------------|--------------|--------------|--------------|--------------|--------------|--------------|
|                      | deg          | m            |              |
| 2pt-5dof-3d3d (ours) | 0.137        | 0.134        | <u>0.158</u> | 0.083        | <u>0.158</u> | 0.097        | <u>0.168</u> | 0.126        | <u>0.177</u> | 0.094        | <u>0.168</u> | 0.116        | <b>100.0</b> |
| 1pt-1*dof-2d2d [6]   | 0.213        | 0.796        | 0.196        | 0.486        | 0.239        | 0.680        | 0.244        | 0.899        | 0.268        | 0.694        | 0.239        | 0.694        | 99.4         |
| 2pt-3dof-2d3d [1]    | 0.128        | <u>0.097</u> | <u>0.158</u> | <u>0.069</u> | 0.179        | <u>0.086</u> | 0.175        | <u>0.096</u> | 0.206        | <u>0.093</u> | 0.175        | <u>0.094</u> | <b>100.0</b> |
| 3pt-6dof-3d3d [4]    | 0.239        | 0.184        | 0.243        | 0.108        | 0.226        | 0.115        | 0.271        | 0.163        | 0.245        | 0.115        | 0.245        | 0.147        | <b>100.0</b> |
| 3pt-6dof-2d3d [5]    | <b>0.077</b> | <b>0.043</b> | <b>0.073</b> | <b>0.025</b> | <b>0.082</b> | <b>0.032</b> | <b>0.089</b> | <b>0.037</b> | <b>0.091</b> | <b>0.026</b> | <b>0.082</b> | <b>0.032</b> | <b>100.0</b> |
| 3pt-2*dof-2d2d [3]   | 0.154        | 0.122        | 0.170        | 0.084        | 0.188        | 0.095        | 0.188        | 0.123        | 0.211        | 0.102        | 0.188        | 0.114        | <b>100.0</b> |

Table 3. Median orientation error (in degrees), translation error (in meters), and success rate (in %) on the KITTI dataset [2] (stride of 2). Best in bold, best of planar methods underlined. The column ALL contains the median for all 11 sequences.

| Sequence             | 00           |              | 01           |              | 02           |              | 03           |              | 04           |              | 05           |              |  |  |
|----------------------|--------------|--------------|--------------|--------------|--------------|--------------|--------------|--------------|--------------|--------------|--------------|--------------|--|--|
|                      | deg          | m            |  |  |
| 2pt-5dof-3d3d (ours) | <u>0.261</u> | <u>0.152</u> | 0.200        | 2.145        | <u>0.247</u> | <u>0.178</u> | <u>0.229</u> | <u>0.190</u> | 0.209        | 0.328        | <u>0.194</u> | <u>0.149</u> |  |  |
| 1pt-1*dof-2d2d [6]   | 0.609        | 1.251        | 0.295        | 4.049        | 0.515        | 1.805        | 0.491        | 1.062        | 0.234        | 2.550        | 0.394        | 1.283        |  |  |
| 2pt-3dof-2d3d [1]    | 0.473        | 0.336        | <u>0.179</u> | <u>1.096</u> | 0.373        | 0.239        | 0.360        | 0.199        | <u>0.200</u> | <u>0.241</u> | 0.270        | 0.164        |  |  |
| 3pt-6dof-3d3d [4]    | 0.262        | 0.150        | <u>0.376</u> | <u>3.069</u> | 0.271        | 0.183        | 0.227        | 0.170        | <u>0.315</u> | 0.432        | 0.227        | 0.143        |  |  |
| 3pt-6dof-2d3d [5]    | <b>0.120</b> | <b>0.048</b> | <b>0.100</b> | <b>0.485</b> | <b>0.117</b> | <b>0.057</b> | <b>0.089</b> | <b>0.042</b> | <b>0.099</b> | <b>0.085</b> | <b>0.097</b> | <b>0.043</b> |  |  |
| 3pt-2*dof-2d2d [3]   | 0.440        | 0.309        | 0.199        | 1.453        | 0.350        | 0.230        | 0.349        | 0.204        | 0.212        | 0.256        | 0.271        | 0.182        |  |  |

  

| Sequence             | 06           |              | 07           |              | 08           |              | 09           |              | 10           |              | ALL          |              | %            |
|----------------------|--------------|--------------|--------------|--------------|--------------|--------------|--------------|--------------|--------------|--------------|--------------|--------------|--------------|
|                      | deg          | m            |              |
| 2pt-5dof-3d3d (ours) | <u>0.172</u> | <u>0.198</u> | <u>0.207</u> | 0.118        | 0.209        | <u>0.147</u> | <u>0.232</u> | <u>0.193</u> | <u>0.244</u> | <u>0.149</u> | <u>0.209</u> | <u>0.178</u> | <b>100.0</b> |
| 1pt-1*dof-2d2d [6]   | 0.398        | 1.493        | 0.360        | 0.923        | 0.468        | 1.219        | 0.519        | 1.680        | 0.477        | 1.257        | 0.468        | 1.283        | 92.4         |
| 2pt-3dof-2d3d [1]    | 0.200        | 0.210        | 0.271        | 0.138        | 0.325        | 0.195        | 0.318        | 0.236        | 0.369        | 0.246        | 0.318        | 0.236        | 99.9         |
| 3pt-6dof-3d3d [4]    | 0.231        | 0.190        | 0.236        | 0.116        | 0.241        | 0.141        | 0.281        | 0.207        | 0.259        | 0.145        | 0.259        | 0.170        | <b>100.0</b> |
| 3pt-6dof-2d3d [5]    | <b>0.094</b> | <b>0.070</b> | <b>0.098</b> | <b>0.037</b> | <b>0.102</b> | <b>0.049</b> | <b>0.114</b> | <b>0.057</b> | <b>0.110</b> | <b>0.041</b> | <b>0.100</b> | <b>0.049</b> | <b>100.0</b> |
| 3pt-2*dof-2d2d [3]   | 0.211        | 0.210        | 0.271        | 0.145        | 0.315        | 0.185        | 0.321        | 0.245        | 0.368        | 0.227        | 0.315        | 0.227        | <b>100.0</b> |

*Proceedings of the European Conference on Computer Vision (ECCV), September 2018.*

- [6] Davide Scaramuzza. 1-point-ransac structure from motion for vehicle-mounted cameras by exploiting non-holonomic constraints. *International Journal of Computer Vision*, 95:74–85, 2011.
- [7] J. Sturm, N. Engelhard, F. Endres, W. Burgard, and D. Cremers. A benchmark for the evaluation of rgb-d slam systems. In *Proc. of the International Conference on Intelligent Robot Systems (IROS)*, Oct. 2012.

Table 4. Median orientation error (in degrees), translation error (in meters), and success rate (in %) on the KITTI dataset [2] (stride of 5). Best in bold, best of planar methods underlined. The column ALL contains the median for all 11 sequences.

| Sequence             | 00           |              | 01           |              | 02           |              | 03           |              | 04           |              | 05           |              |
|----------------------|--------------|--------------|--------------|--------------|--------------|--------------|--------------|--------------|--------------|--------------|--------------|--------------|
|                      | deg          | m            |
| 2pt-5dof-3d3d (ours) | <u>0.444</u> | <u>0.306</u> | <u>0.353</u> | 5.568        | <u>0.426</u> | <u>0.395</u> | <u>0.389</u> | <u>0.342</u> | 0.365        | <u>0.752</u> | <u>0.293</u> | <u>0.273</u> |
| 1pt-1*dof-2d2d [6]   | 0.904        | 3.270        | 0.421        | 11.713       | 0.714        | 4.807        | 0.740        | 2.426        | 0.376        | 6.801        | 0.645        | 3.145        |
| 2pt-3dof-2d3d [1]    | 0.841        | 1.328        | 0.354        | <u>4.434</u> | 0.734        | 1.257        | 0.658        | 0.955        | <u>0.358</u> | 0.886        | 0.527        | 0.732        |
| 3pt-6dof-3d3d [4]    | 0.394        | 0.303        | 0.744        | 7.972        | 0.458        | 0.437        | 0.333        | 0.344        | 0.496        | 0.936        | 0.304        | 0.275        |
| 3pt-6dof-2d3d [5]    | <b>0.188</b> | <b>0.110</b> | <b>0.181</b> | <b>1.753</b> | <b>0.200</b> | <b>0.151</b> | <b>0.128</b> | <b>0.095</b> | <b>0.163</b> | <b>0.179</b> | <b>0.141</b> | <b>0.088</b> |
| 3pt-2*dof-2d2d [3]   | 0.795        | 1.193        | 0.371        | 5.592        | 0.677        | 1.177        | 0.647        | 0.933        | 0.360        | 0.860        | 0.488        | 0.708        |

  

| Sequence             | 06           |              | 07           |              | 08           |              | 09           |              | 10           |              | ALL          |              | %            |
|----------------------|--------------|--------------|--------------|--------------|--------------|--------------|--------------|--------------|--------------|--------------|--------------|--------------|--------------|
|                      | deg          | m            |              |
| 2pt-5dof-3d3d (ours) | <u>0.244</u> | <u>0.465</u> | <u>0.291</u> | <u>0.198</u> | <u>0.343</u> | <u>0.298</u> | <u>0.428</u> | <u>0.424</u> | <u>0.392</u> | <u>0.290</u> | <u>0.365</u> | <u>0.342</u> | <b>100.0</b> |
| 1pt-1*dof-2d2d [6]   | 0.631        | 3.869        | 0.544        | 2.164        | 0.747        | 2.947        | 0.799        | 4.458        | 0.667        | 2.184        | 0.667        | 3.270        | 53.0         |
| 2pt-3dof-2d3d [1]    | 0.341        | 0.817        | 0.526        | 0.554        | 0.645        | 1.011        | 0.716        | 1.344        | 0.701        | 1.279        | 0.645        | 1.011        | 97.8         |
| 3pt-6dof-3d3d [4]    | 0.394        | 0.448        | 0.329        | 0.216        | 0.363        | 0.323        | 0.517        | 0.536        | 0.408        | 0.321        | 0.394        | 0.344        | <b>100.0</b> |
| 3pt-6dof-2d3d [5]    | <b>0.148</b> | <b>0.154</b> | <b>0.150</b> | <b>0.079</b> | <b>0.166</b> | <b>0.113</b> | <b>0.204</b> | <b>0.153</b> | <b>0.174</b> | <b>0.099</b> | <b>0.166</b> | <b>0.113</b> | <b>100.0</b> |
| 3pt-2*dof-2d2d [3]   | 0.338        | 0.821        | 0.494        | 0.513        | 0.586        | 0.962        | 0.684        | 1.333        | 0.670        | 1.168        | 0.586        | 0.962        | 98.8         |

Table 5. Median orientation error (in degrees), translation error (in meters), and success rate (in %) on the TUM dataset [7] (stride of 5). Best in bold, best of planar methods underlined. The column ALL contains the median for all 4 sequences.

| Sequence             | 360          |              | slam         |              | slam2        |              | slam3        |              | ALL          |              | %           |
|----------------------|--------------|--------------|--------------|--------------|--------------|--------------|--------------|--------------|--------------|--------------|-------------|
|                      | deg          | m            |             |
| 2pt-5dof-3d3d (ours) | 1.003        | 0.088        | <u>0.773</u> | <u>0.044</u> | 0.749        | 0.045        | 0.496        | 0.032        | 0.761        | 0.045        | <u>98.2</u> |
| 1pt-1*dof-2d2d [6]   | <b>0.821</b> | <u>0.055</u> | 0.800        | 0.053        | <u>0.662</u> | <u>0.034</u> | <u>0.480</u> | <b>0.021</b> | <u>0.731</u> | <u>0.044</u> | 77.4        |
| 2pt-3dof-2d3d [1]    | 1.307        | 0.171        | 1.099        | 0.118        | 0.890        | 0.069        | 0.650        | 0.052        | 0.994        | 0.094        | 92.1        |
| 3pt-6dof-3d3d [4]    | 1.444        | 0.141        | 1.039        | 0.071        | 0.984        | 0.073        | 0.715        | 0.053        | 1.012        | 0.072        | <b>98.5</b> |
| 3pt-6dof-2d3d [5]    | 0.882        | <b>0.054</b> | <b>0.703</b> | <b>0.029</b> | <b>0.624</b> | <b>0.026</b> | <b>0.421</b> | 0.022        | <b>0.663</b> | <b>0.028</b> | 98.0        |
| 3pt-2*dof-2d2d [3]   | 0.900        | 0.101        | 0.826        | 0.077        | 0.699        | 0.042        | 0.521        | 0.033        | 0.763        | 0.059        | 93.2        |

Table 6. Median orientation error (in degrees), translation error (in meters), and success rate (in %) on the TUM dataset [7] (stride of 10). Best in bold, best of planar methods underlined. The column ALL contains the median for all 4 sequences.

| Sequence             | 360          |              | slam         |              | slam2        |              | slam3        |              | ALL          |              | %           |
|----------------------|--------------|--------------|--------------|--------------|--------------|--------------|--------------|--------------|--------------|--------------|-------------|
|                      | deg          | m            |             |
| 2pt-5dof-3d3d (ours) | <u>1.260</u> | 0.107        | <u>1.016</u> | <u>0.061</u> | <u>0.870</u> | <u>0.055</u> | <u>0.608</u> | 0.042        | <u>0.943</u> | <u>0.058</u> | <u>97.1</u> |
| 1pt-1*dof-2d2d [6]   | 1.328        | <u>0.086</u> | 1.237        | 0.095        | 0.980        | <u>0.055</u> | 0.775        | <u>0.034</u> | 1.108        | 0.071        | 68.5        |
| 2pt-3dof-2d3d [1]    | 1.817        | 0.249        | 1.602        | 0.188        | 1.452        | 0.134        | 1.075        | 0.098        | 1.527        | 0.161        | 88.3        |
| 3pt-6dof-3d3d [4]    | 1.956        | 0.189        | 1.382        | 0.102        | 1.280        | 0.092        | 0.974        | 0.076        | 1.331        | 0.097        | <b>97.4</b> |
| 3pt-6dof-2d3d [5]    | <b>1.082</b> | <b>0.081</b> | <b>0.894</b> | <b>0.048</b> | <b>0.748</b> | <b>0.039</b> | <b>0.557</b> | <b>0.033</b> | <b>0.821</b> | <b>0.044</b> | 96.7        |
| 3pt-2*dof-2d2d [3]   | 1.457        | 0.175        | 1.315        | 0.115        | 1.115        | 0.074        | 0.861        | 0.059        | 1.215        | 0.094        | 90.4        |

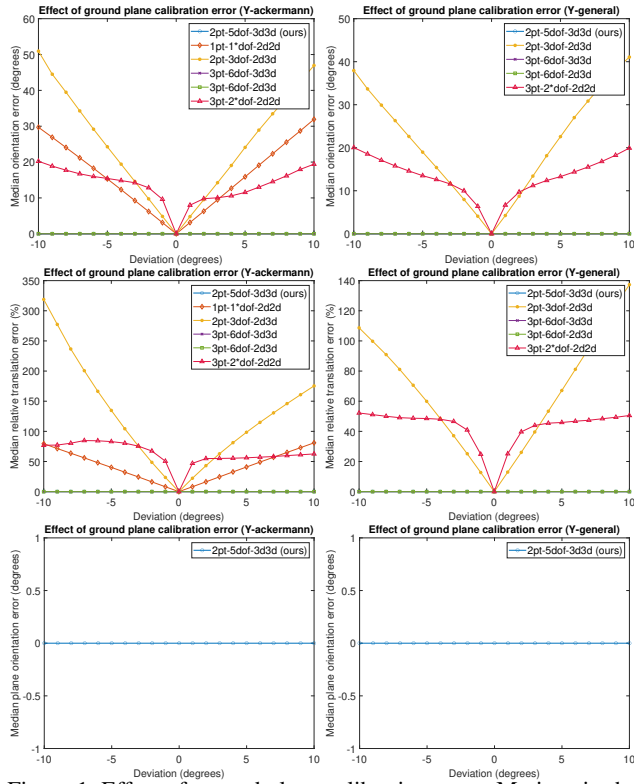

Figure 1. Effect of ground plane calibration error. Motions in the datasets were rotated about the  $z$  axis.

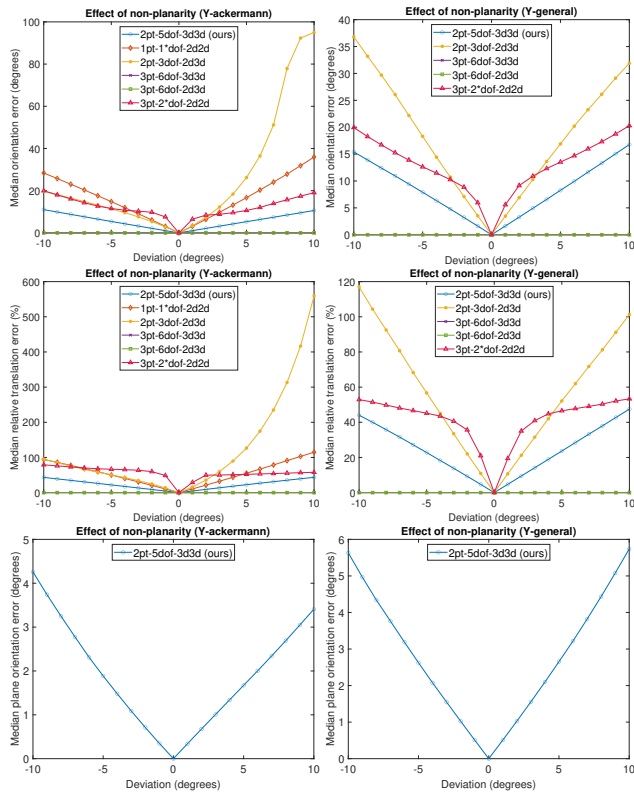

Figure 2. Effect of the non-planarity of motion when rotating  $t$  towards/away from the rotation axis.
